# Supplementary material for: Microfluidic Synthesis of Highly Potent Limit-size Lipid Nanoparticles for In Vivo Delivery of siRNA
Source: PubMed Central journal article supplement — Mol Ther Nucleic Acids. 2012 Aug 14;1(8):e37–. doi: 10.1038/mtna.2012.28 (PMC3442367; doi:10.1038/mtna.2012.28), 2012-08-14
Supplement: mtna201228x1.pdf [file mtna201228x1.pdf]

a.

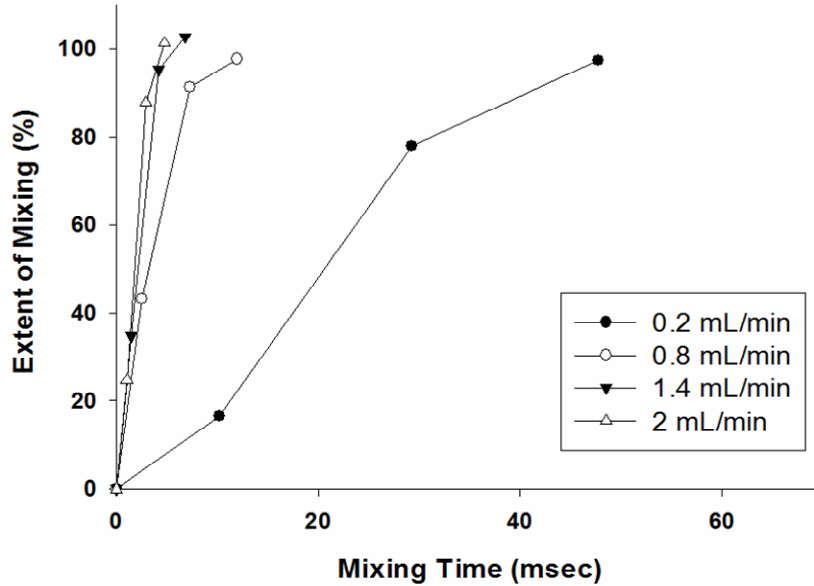

b.

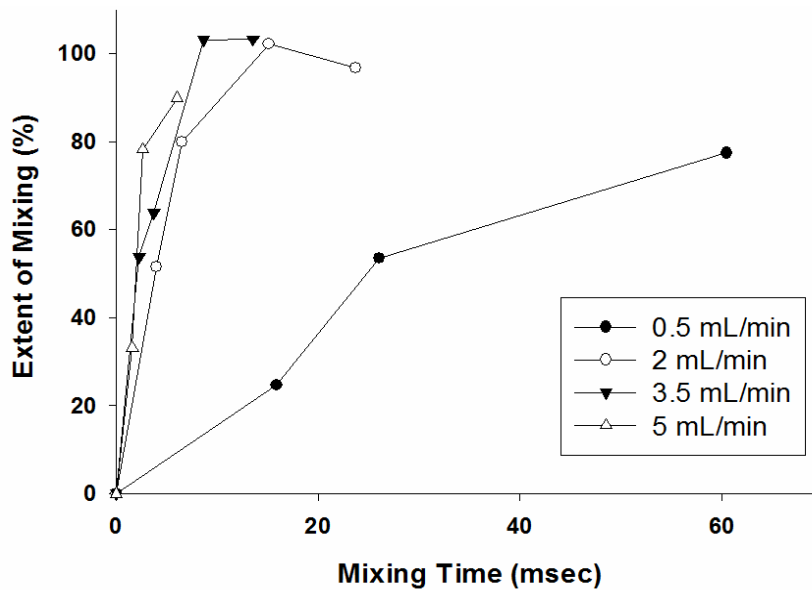

**Supplementary Figure S1: Influence of volumetric flow rate on extent of mixing in SHM.** The extent of mixing was determined with two 10  $\mu$ M fluorescein solutions, one fluorescent at pH 8.9 and the other non-fluorescent at pH 5.1, at approximately 2.1 mm, 6.2 mm, and 10.1 mm along the channel length. a. SHM with a channel cross-section of

79  $\mu\text{m}$  x 200  $\mu\text{m}$ . The two solutions were mixed at a 1:1 ratio using total flow rates of 0.2 ml/min ( $\bullet$ ), 0.8 ml/min ( $\circ$ ), 1.4 ml/min ( $\blacktriangledown$ ) and 2.0 ml/min ( $\Delta$ ). b. SHM with a channel cross-section of 130  $\mu\text{m}$  x 300  $\mu\text{m}$ . The two solutions were mixed at a 1:1 ratio using total flow rates of 0.5 ml/min ( $\bullet$ ), 2 ml/min ( $\circ$ ), 3.5 ml/min ( $\blacktriangledown$ ) and 5 ml/min ( $\Delta$ ). Note that only 5 equally spaced slices were taken when imaging the 130  $\mu\text{m}$  x 300  $\mu\text{m}$  geometry.
