# Supplementary material for: Microfluidic Synthesis of Highly Potent Limit-size Lipid Nanoparticles for In Vivo Delivery of siRNA
Source: PubMed Central journal article supplement — Mol Ther Nucleic Acids. 2012 Aug 14;1(8):e37–. doi: 10.1038/mtna.2012.28 (PMC3442367; doi:10.1038/mtna.2012.28), 2012-08-14
Supplement: mtna201228x2.pdf [file mtna201228x2.pdf]

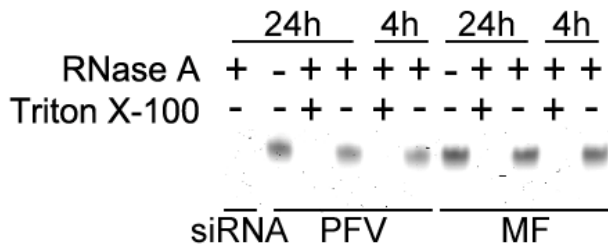

**Supplementary Figure S2: Protection of siRNA from degradation during incubation in serum.** 2.5ug of free or LNP encapsulated siRNA by either MF or PFV methods were incubated in mouse serum in the presence or absence of 0.5% Triton X-100 and 2.5ng/uL RNase A (Ambion). Reactions were quenched with deionized formamide after 1, 2, 4, and 24 hours and resolved on a 12% denaturing urea-polyacrylamide gel. Gels were stained with SYBR Safe (Invitrogen) in TBE buffer for 30 minutes and visualized on a Typhoon imager (GE Healthcare).
