# Supplementary material for: Microfluidic Synthesis of Highly Potent Limit-size Lipid Nanoparticles for In Vivo Delivery of siRNA
Source: PubMed Central journal article supplement — Mol Ther Nucleic Acids. 2012 Aug 14;1(8):e37–. doi: 10.1038/mtna.2012.28 (PMC3442367; doi:10.1038/mtna.2012.28), 2012-08-14
Supplement: mtna201228x3.pdf [file mtna201228x3.pdf]

**a.**

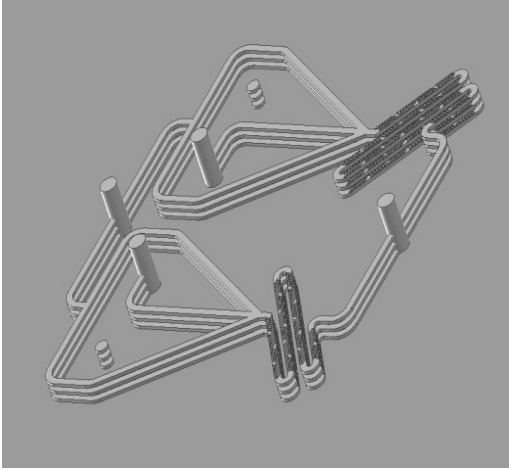

**b.**

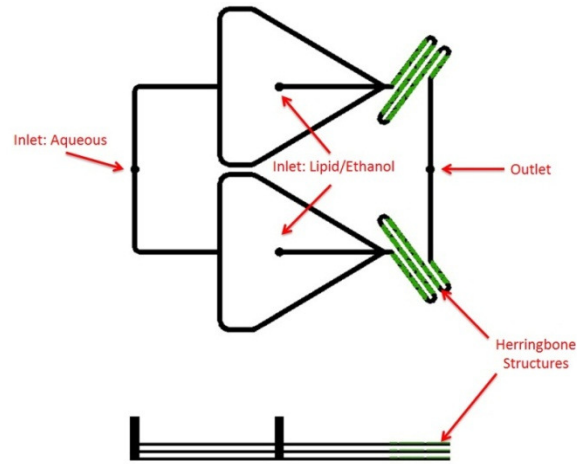

**Supplementary Figure S3: Schematic of 6x scale-up microfluidic device for formulation of lipid nanoparticles using individual microfluidic SHM mixers. a.**

**CAD drawing of 6x scale-up SHM. b. Schematic of 6x scale-up SHM.**
