# Supplementary material for: Microfluidic Synthesis of Highly Potent Limit-size Lipid Nanoparticles for In Vivo Delivery of siRNA
Source: PubMed Central journal article supplement — Mol Ther Nucleic Acids. 2012 Aug 14;1(8):e37–. doi: 10.1038/mtna.2012.28 (PMC3442367; doi:10.1038/mtna.2012.28), 2012-08-14
Supplement: mtna201228x4.pdf [file mtna201228x4.pdf]

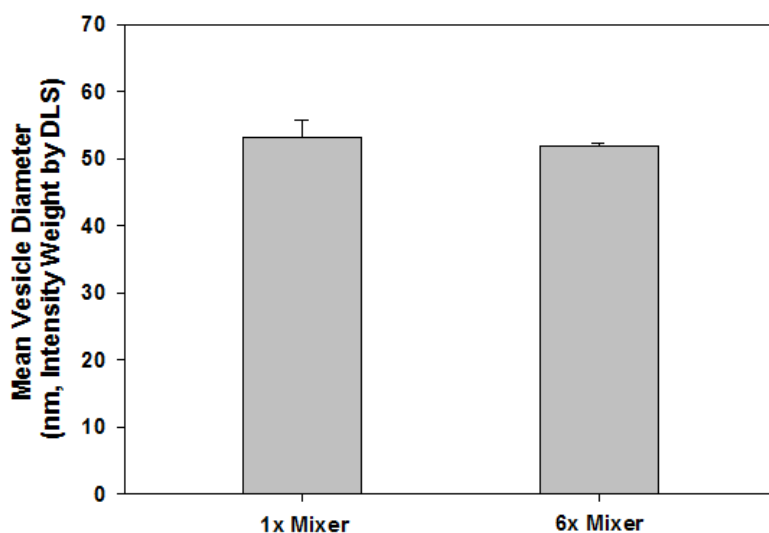

**Supplementary Figure S4: Scale-up of 1-palmitoyl, 2-oleoyl PC (POPC)/ Cholesterol Vesicles by parallelization of individual microfluidic SHM mixers.** Limit size LNP composed of 1-palmitoyl, 2-oleoyl phosphatidylcholine (POPC)/cholesterol (55/45; mol/mol) were made by mixing lipid in ethanol with aqueous buffer at a buffer-to-ethanol volumetric flow rate ratio of 3:1, with a total flow rate of 12 ml/min in a single microfluidic mixer having a channel cross-section of 130  $\mu\text{m}$  x 300  $\mu\text{m}$ . The final lipid concentration after mixing was 8 mg/ml. Error bars represent standard deviation of multiple formulations made with the microfluidic mixers ( $n= 7$  for single mixer and  $n= 3$  for 6x mixer).
