# Supplementary material for: Microfluidic Synthesis of Highly Potent Limit-size Lipid Nanoparticles for In Vivo Delivery of siRNA
Source: PubMed Central journal article supplement — Mol Ther Nucleic Acids. 2012 Aug 14;1(8):e37–. doi: 10.1038/mtna.2012.28 (PMC3442367; doi:10.1038/mtna.2012.28), 2012-08-14
Supplement: mtna201228x7.pdf [file mtna201228x7.pdf]

**Table S1: LNP Size as determined by DLS and CryoTEM imaging**

| DLS                                  |      | CryoTEM       |       |
|--------------------------------------|------|---------------|-------|
| Mean Diameter                        | PDI  | Mean Diameter | PDI   |
| Sample 1 containing 1 mol% PEG-c-DMA |      |               |       |
| 55.4 nm                              | 0.02 | 44.5 nm       | 0.023 |
| Sample 2 containing 5 mol% PEG-c-DMA |      |               |       |
| 31.1 nm                              | 0.05 | 22.4 nm       | 0.031 |
